# Supplementary material
Source: MDPI journal article supplement (https://www.mdpi.com/1424-8247/16/10/1375)
Supplement: s1 [file s1]

# Study of Mono and Di-O-caffeoylquinic Acid Isomers in *Acmella oleracea* Extracts by HPLC-MS/MS and Application of Linear Equation of Deconvolution Analysis Algorithm for Their Characterization

Maria Bellumori \*, Marco Pallecchi, Beatrice Zonfrillo, Luigi Lucio, Marta Menicatti, Marzia Innocenti, Nadia Mulinacci and Gianluca Bartolucci \*

## Supplementary Materials

**Table S1.** Chromatographic parameters for each analyte obtained with the proposed HPLC-MS analysis. Rt, retention times  $\pm$  error (2 standard deviation or 2 SD); Base Width, base peaks width; N, efficiency; R, resolution between contiguous analytes. The void time measured for the chromatographic system used was 1.02 min.

|           | Rt<br>(min) | 2 SD<br>(min) | Base Width<br>(min) | 2 SD<br>(min) | N     | R   |
|-----------|-------------|---------------|---------------------|---------------|-------|-----|
| 3-CQA     | 5.93        | 0.04          | 0.38                | 0.05          | 3895  | -   |
| 5-CQA     | 8.58        | 0.04          | 0.43                | 0.06          | 6675  | 6.6 |
| 4-CQA     | 9.29        | 0.04          | 0.31                | 0.05          | 14358 | 2.2 |
| 3,4-diCQA | 17.53       | 0.04          | 0.30                | 0.05          | 54601 | -   |
| 3,5-diCQA | 18.01       | 0.04          | 0.32                | 0.05          | 50680 | 1.6 |
| 4,5-diCQA | 19.39       | 0.04          | 0.37                | 0.05          | 43955 | 4.0 |

**Table S2.** Results of the calibration curve obtained for Ri signal of chlorogenic acid (or 5-CQA), defined as linear regressions parameters (slope and y-intercept), the determination coefficient ( $R^2$ ) and the estimated LOD and LOQ values.

| Compound | MS/MS<br>signal | Slope<br>(counts/mg L <sup>-1</sup> ) | y-Intercept<br>counts) | R <sup>2</sup> | LOD<br>(mg L <sup>-1</sup> ) | LOQ<br>(mg L <sup>-1</sup> ) |
|----------|-----------------|---------------------------------------|------------------------|----------------|------------------------------|------------------------------|
| 5-CQA    | Ri              | 6.2 10 <sup>6</sup>                   | 8.5 10 <sup>4</sup>    | 0.999          | 0.1                          | 0.4                          |

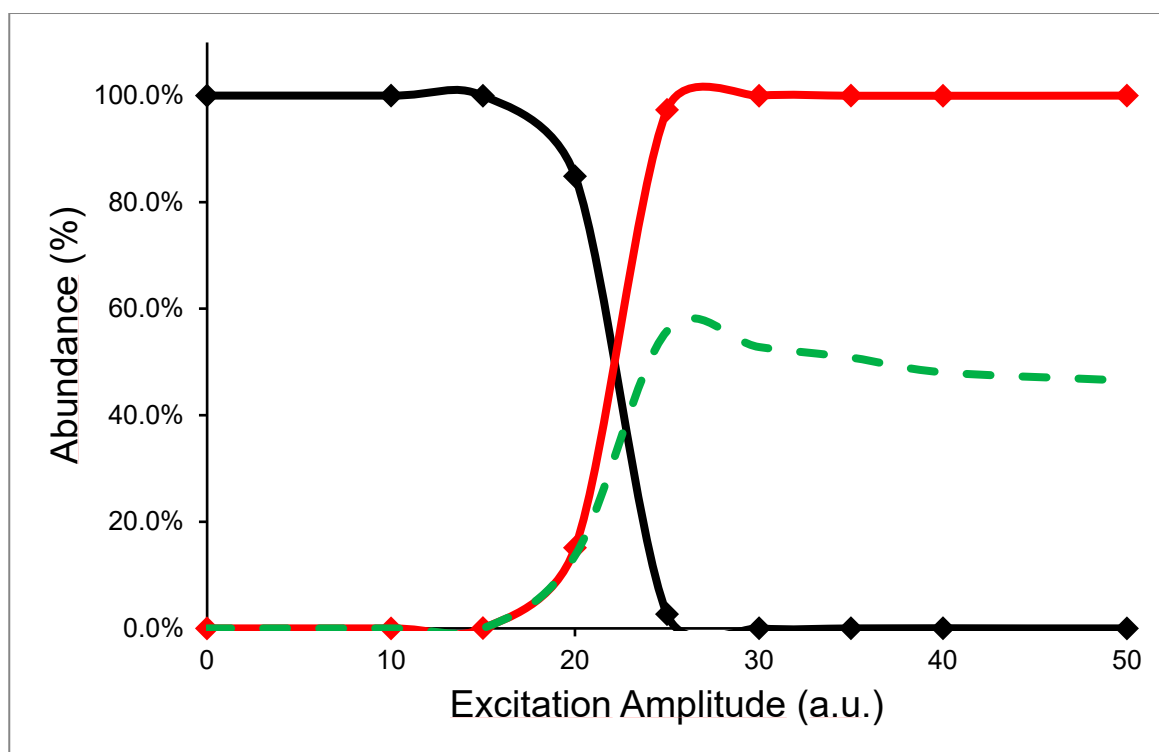

**Figure S1.** Precursor SY curve (black line), PiF (red line) and PiY (green dashed line) of the 3-CQA isomer at ExT 50 ms.

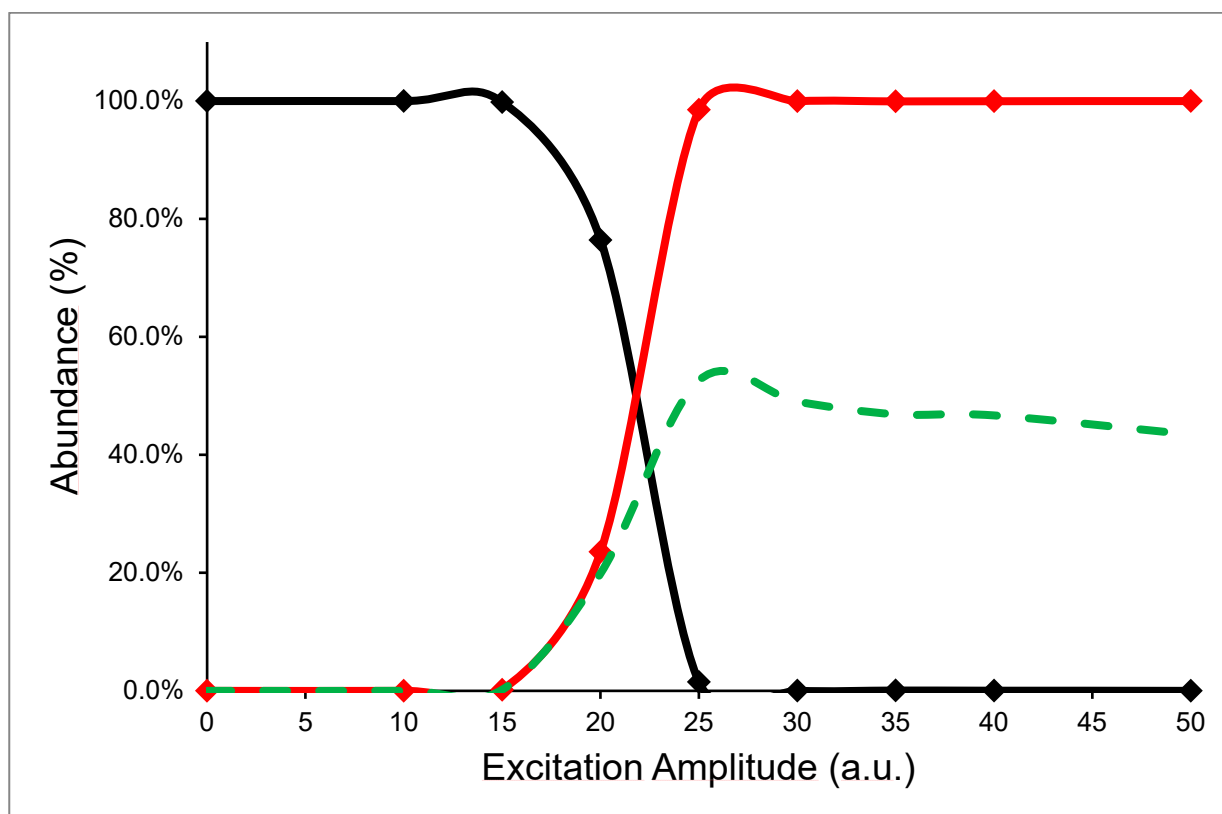

**Figure S2.** Precursor SY curve (black line), PiF (red line) and PiY (green dashed line) of the 4-CQA isomer at ExT 50 ms.

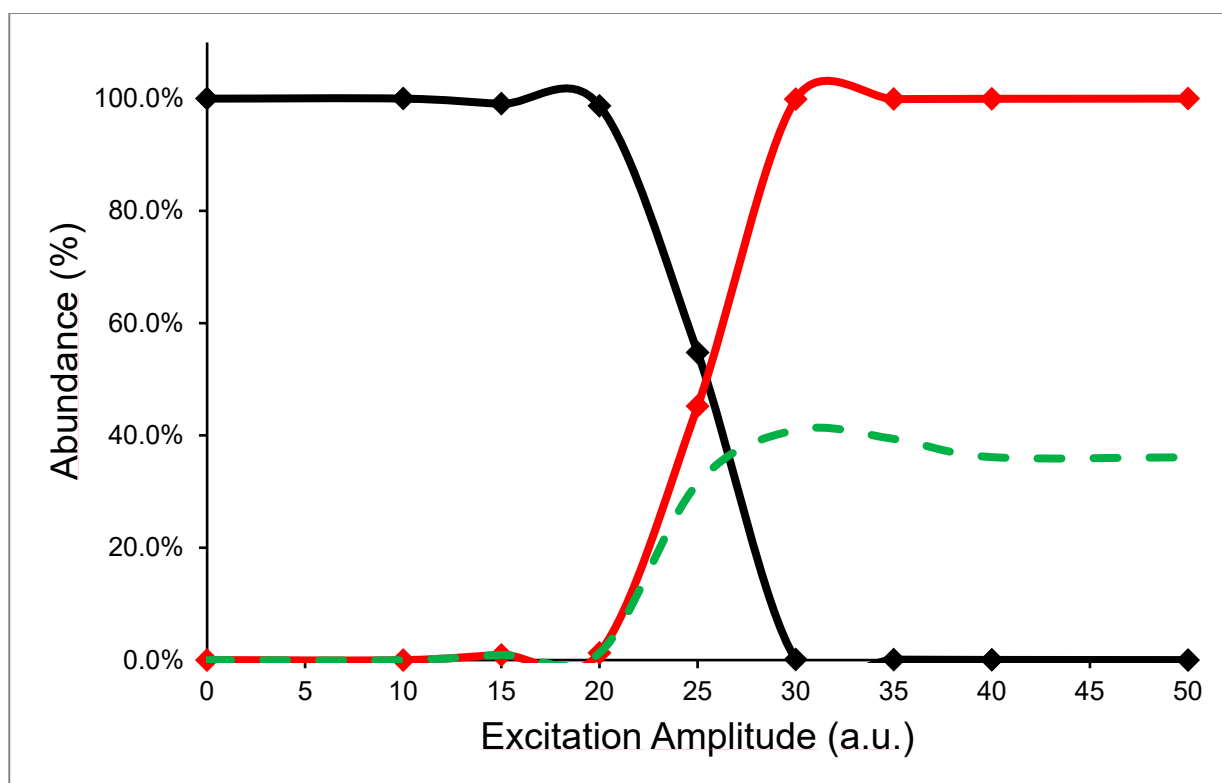

**Figure S3.** Precursor SY curve (black line), PiF (red line) and PiY (green dashed line) of the 3,4-diCQA isomer at ExT 50 ms.

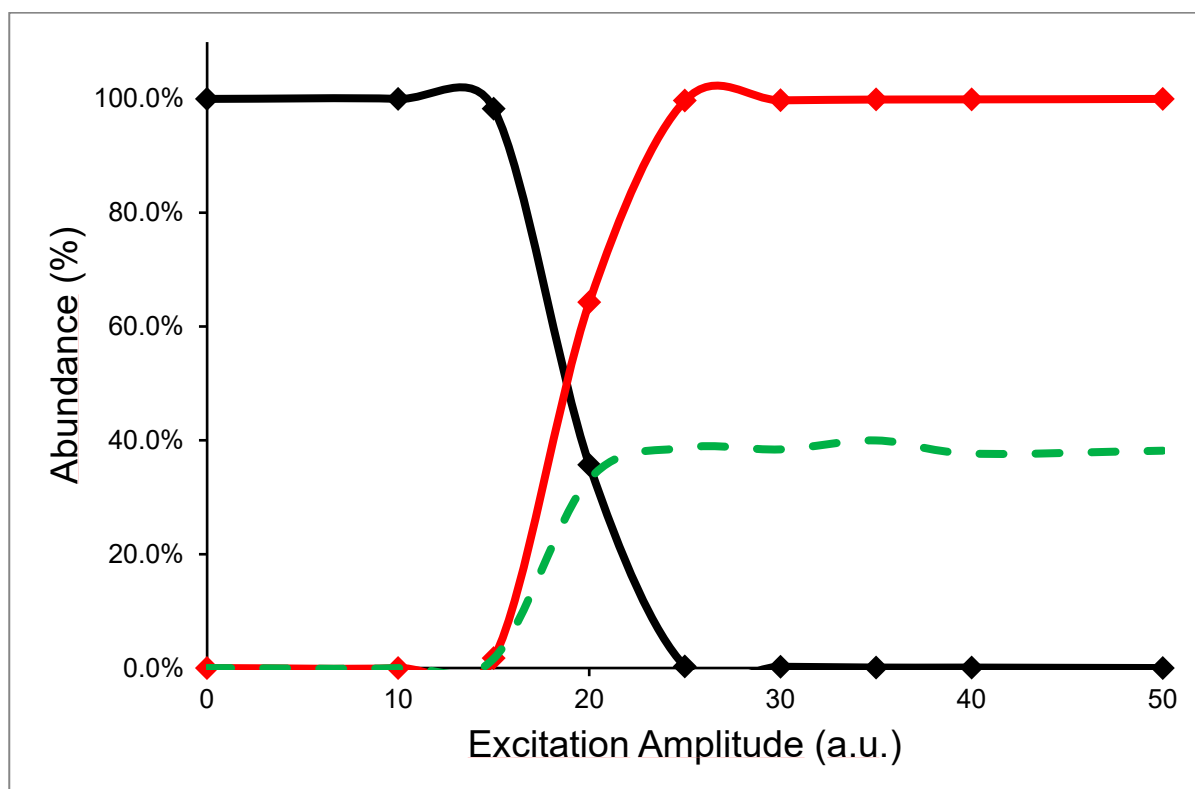

**Figure S4.** Precursor SY curve (black line), PiF (red line) and PiY (green dashed line) of the 3,5-diCQA isomer at ExT 50 ms.

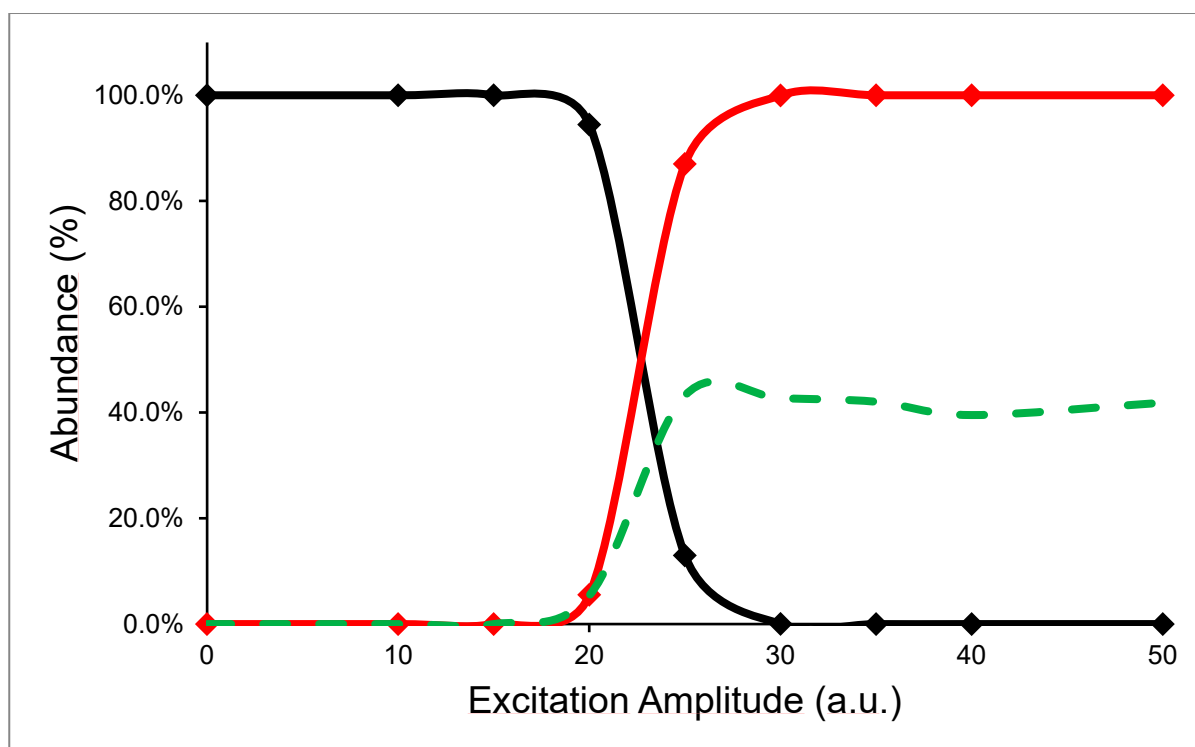

**Figure S5.** Precursor SY curve (black line), PiF (red line) and PiY (green dashed line) of the 4,5-diCQA isomer at ExT 50 ms.

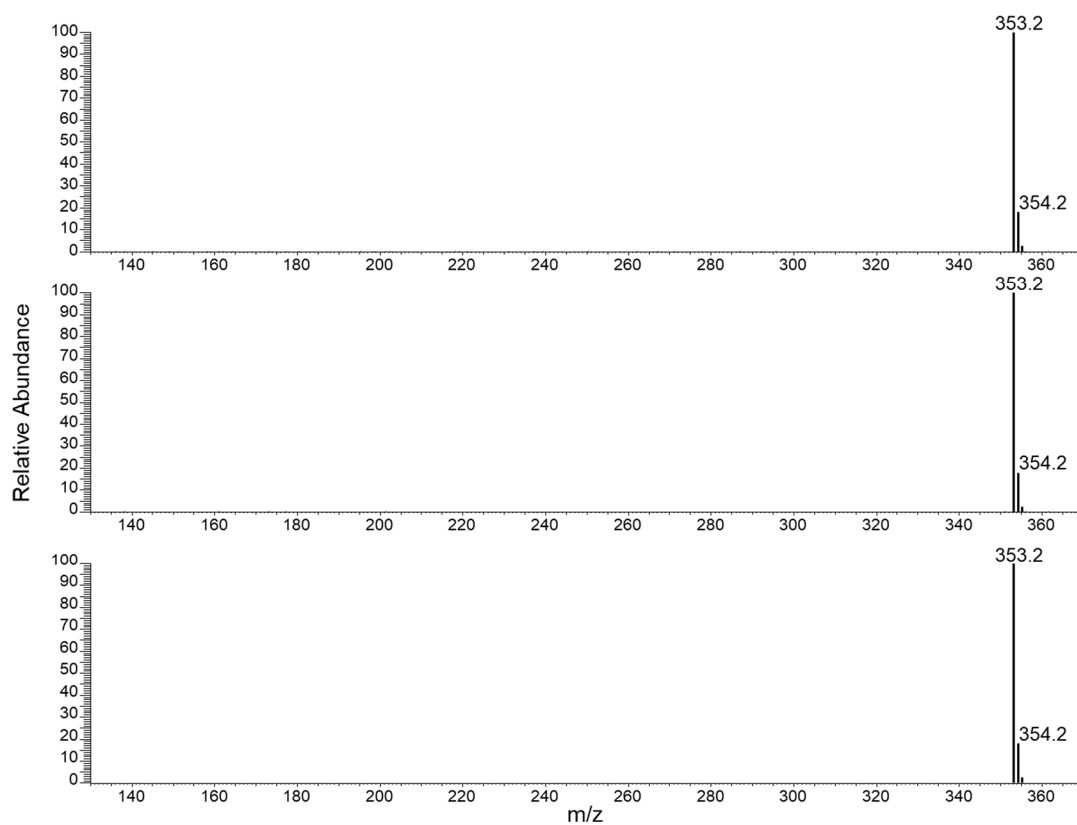

**Figure S6.** ESI negative ions spectra of 3-CQA (upper), 5-CQA (middle) and 4-CQA (bottom).

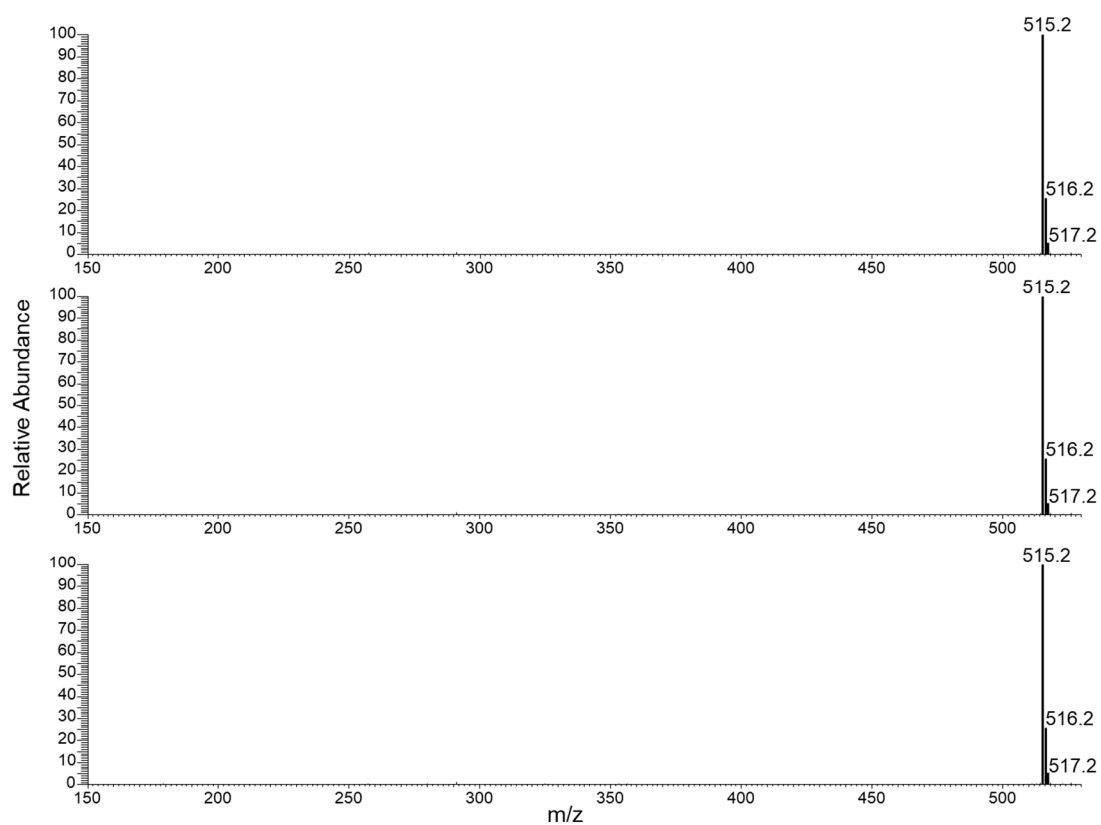

**Figure S7.** ESI negative ions spectra of 3,4-diCQA (upper), 3,5-diCQA (middle) and 4,5-diCQA (bottom).

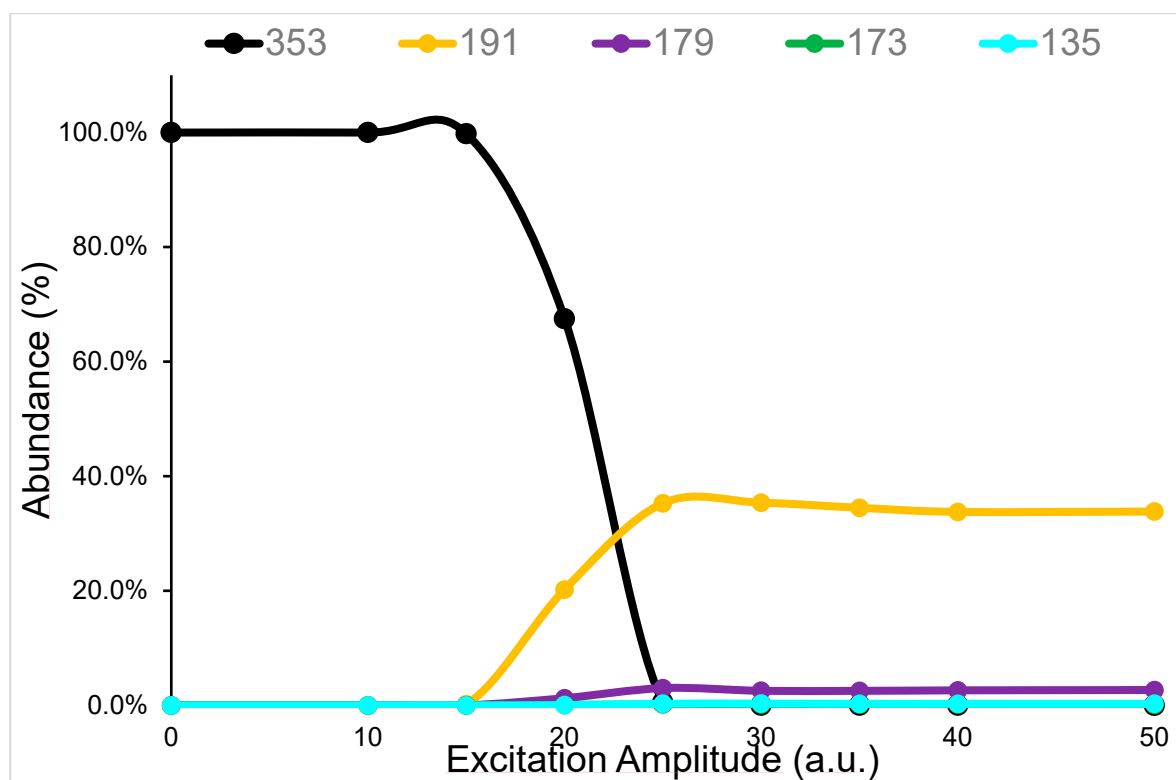

**Figure S8.** The breakdown curves of 5-CQA isomer obtained by elaboration of ERMS data.

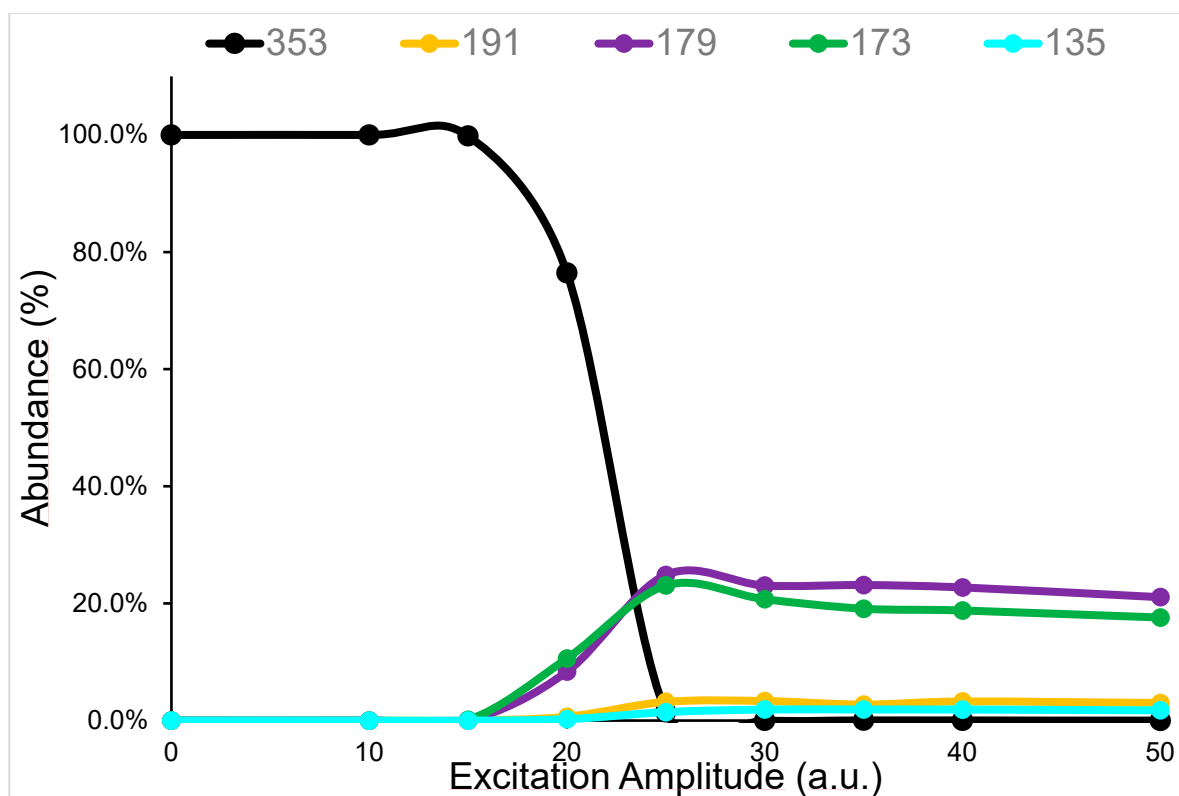

**Figure S9.** The breakdown curves of 4-CQA isomer obtained by elaboration of ERMS data.

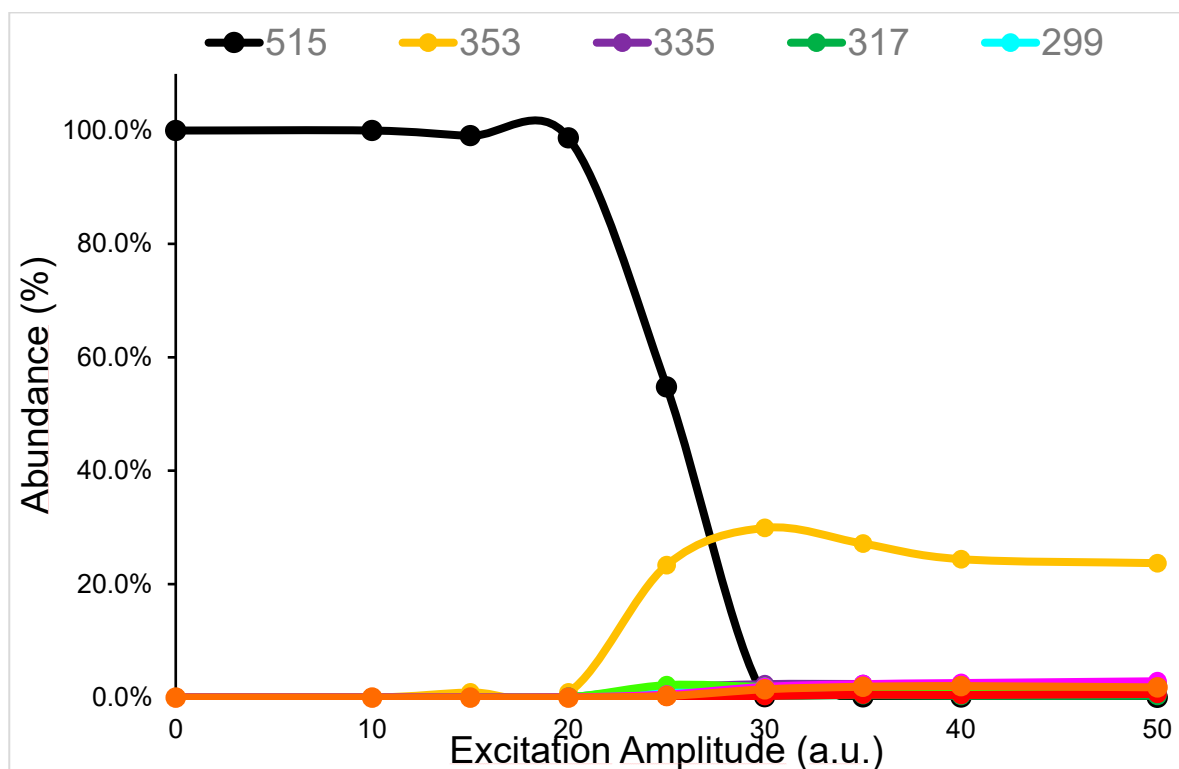

**Figure S10.** The breakdown curves of 3,4-diCQA isomer obtained by elaboration of ERMS data.

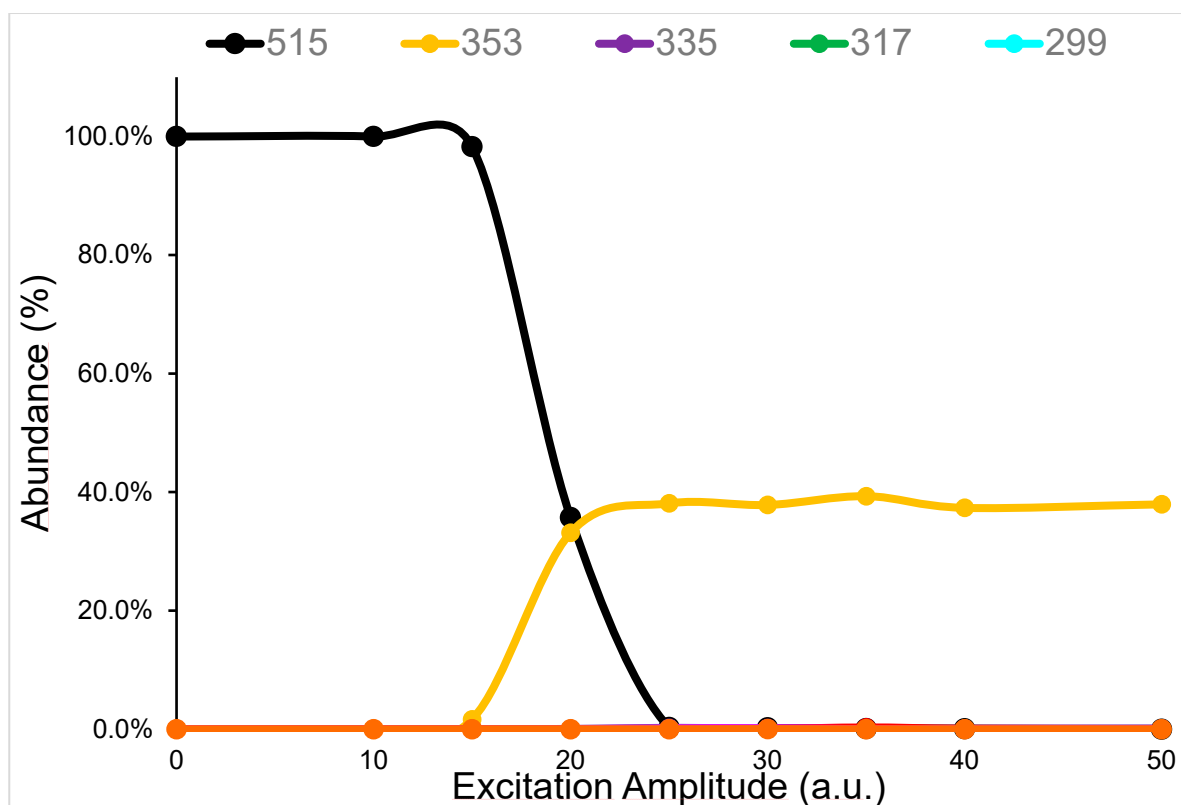

**Figure S11.** The breakdown curves of 3,5-diCQA isomer obtained by elaboration of ERMS data.

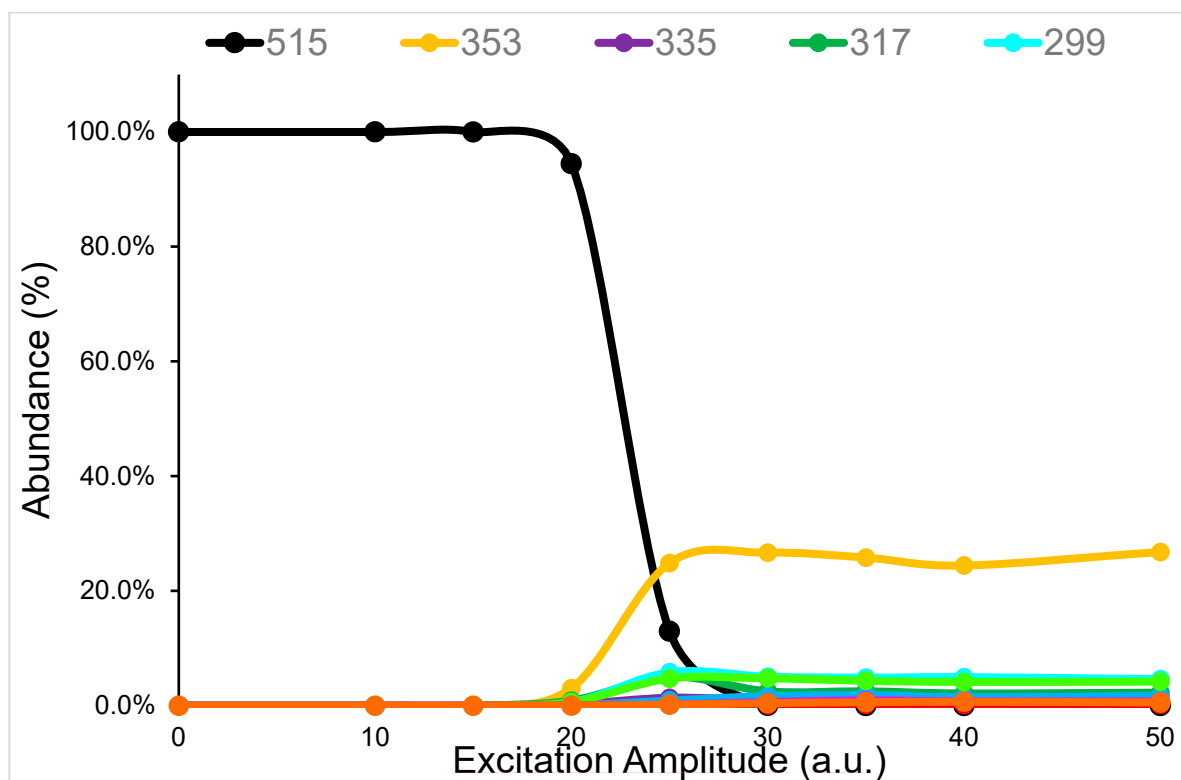

**Figure S12.** The breakdown curves of 4,5-diCQA isomer obtained by elaboration of ERMS data.

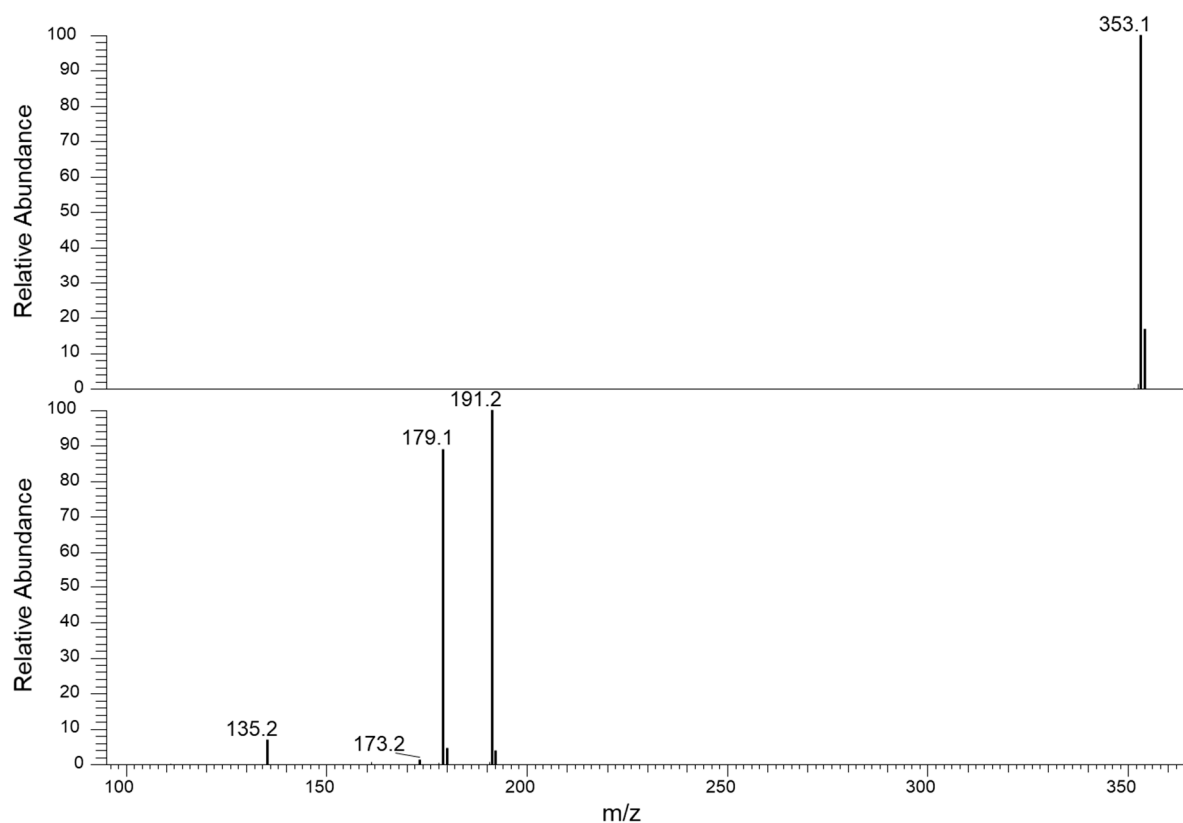

**Figure S13.** Comparison of the MS/MS spectra obtained at low ExA (MS/MS event 1, above), used to monitor the Ri signal, and at high ExA (MS/MS event 2, below), to acquire the Pis signals of 3-CQA.

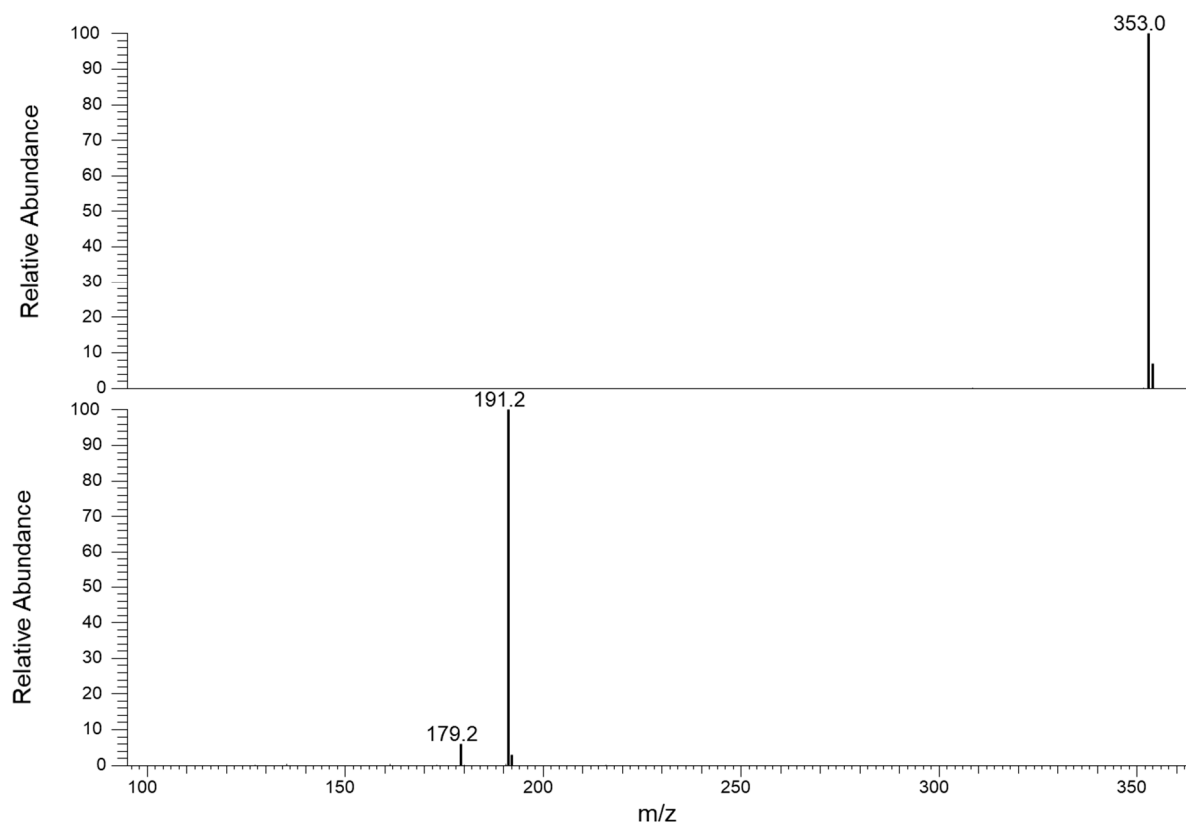

**Figure S14.** Comparison of the MS/MS spectra obtained at low ExA (MS/MS event 1, above), used to monitor the Ri signal, and at high ExA (MS/MS event 2, below), to acquire the Pis signals of 5-CQA.



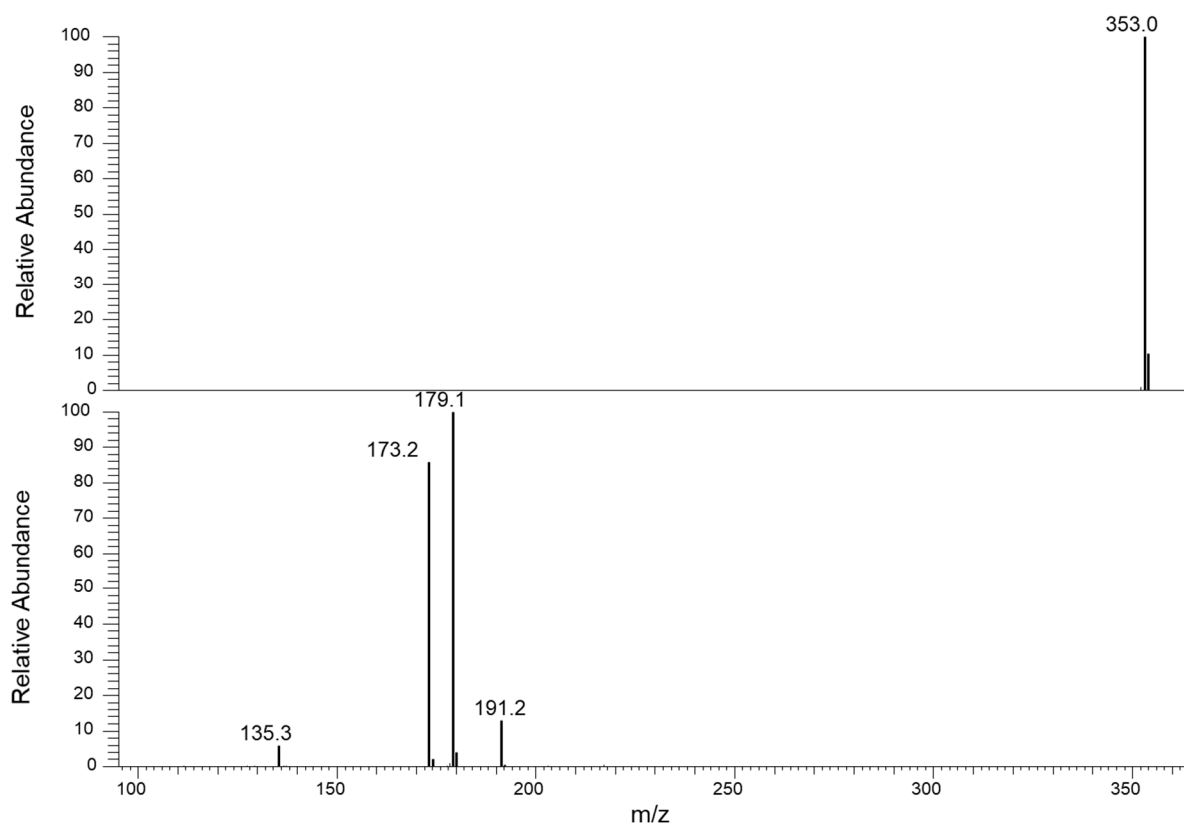

**Figure S15.** Comparison of the MS/MS spectra obtained at low ExA (MS/MS event 1, above), used to monitor the Ri signal, and at high ExA (MS/MS event 2, below), to acquire the Pis signals of 4-CQA.

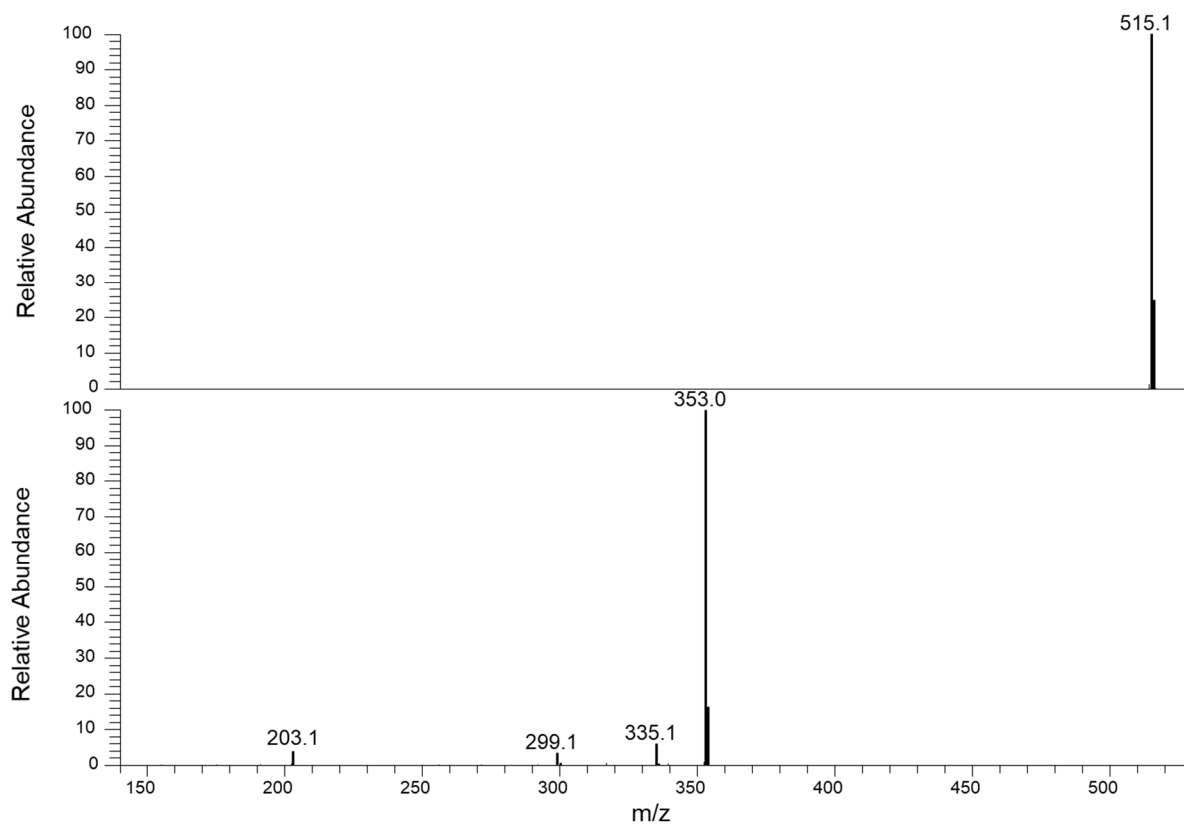

**Figure S16.** Comparison of the MS/MS spectra obtained at low ExA (MS/MS event 1, above), used to monitor the Ri signal, and at high ExA (MS/MS event 2, below), to acquire the Pis signals of 3,4-diCQA.

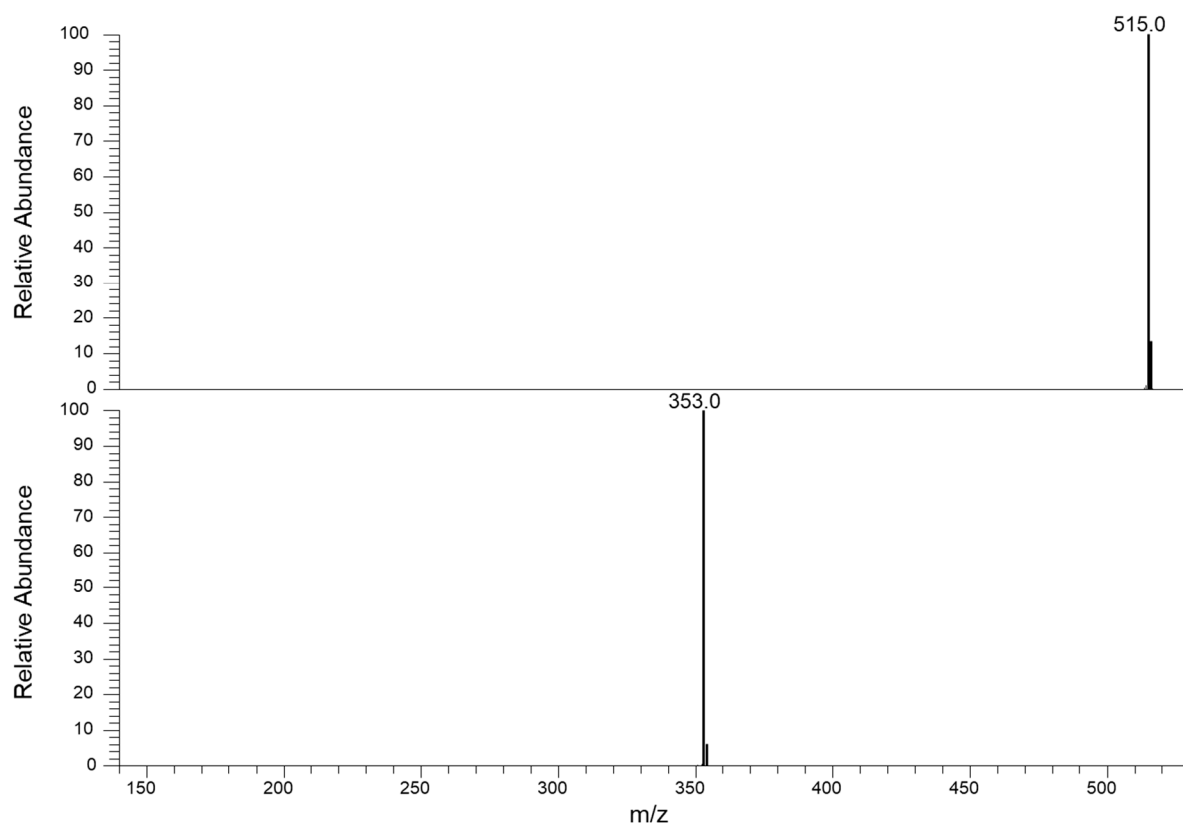

**Figure S17.** Comparison of the MS/MS spectra obtained at low ExA (MS/MS event 1, above), used to monitor the Ri signal, and at high ExA (MS/MS event 2, below), to acquire the Pis signals of 3,5-diCQA.

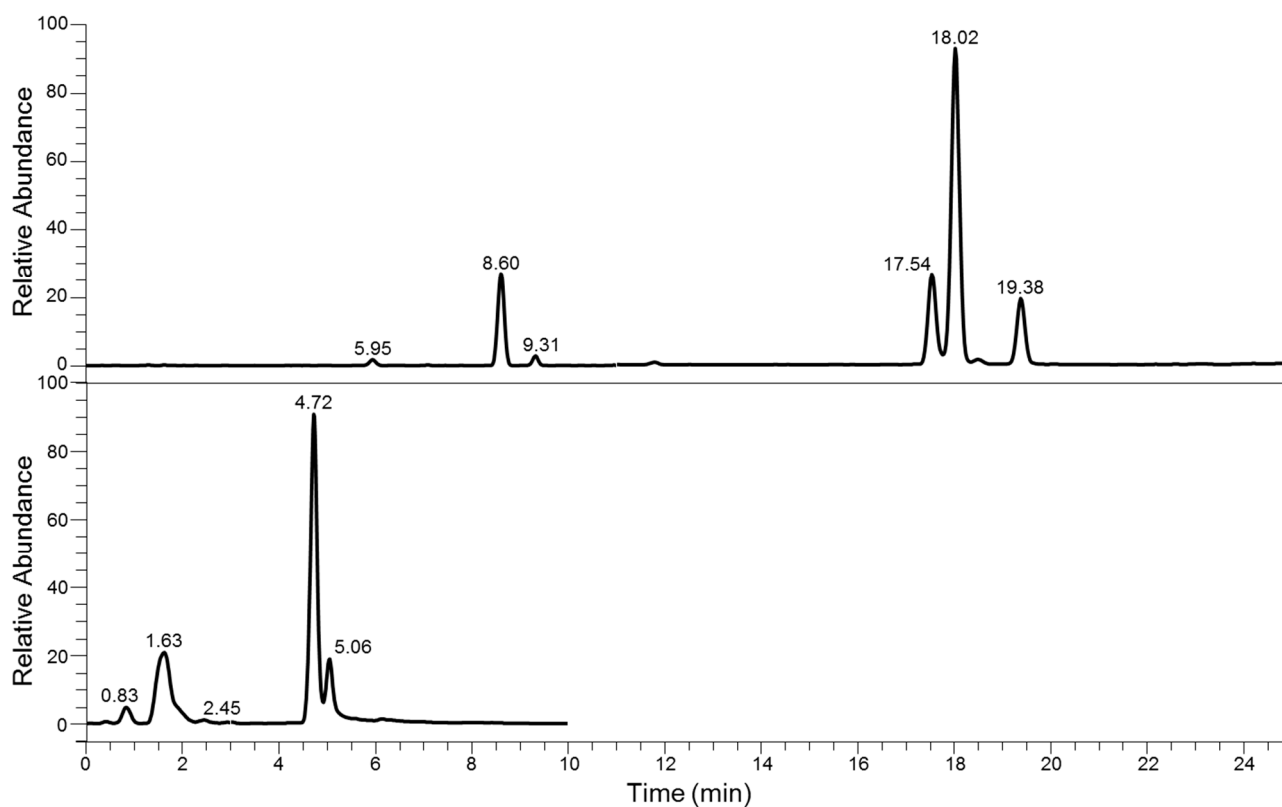

**Figure S18.** Comparison between the HPLC-MS/MS analysis of Acmella WS with ChromSys 1 (above) and ChromSys 2 (bottom).

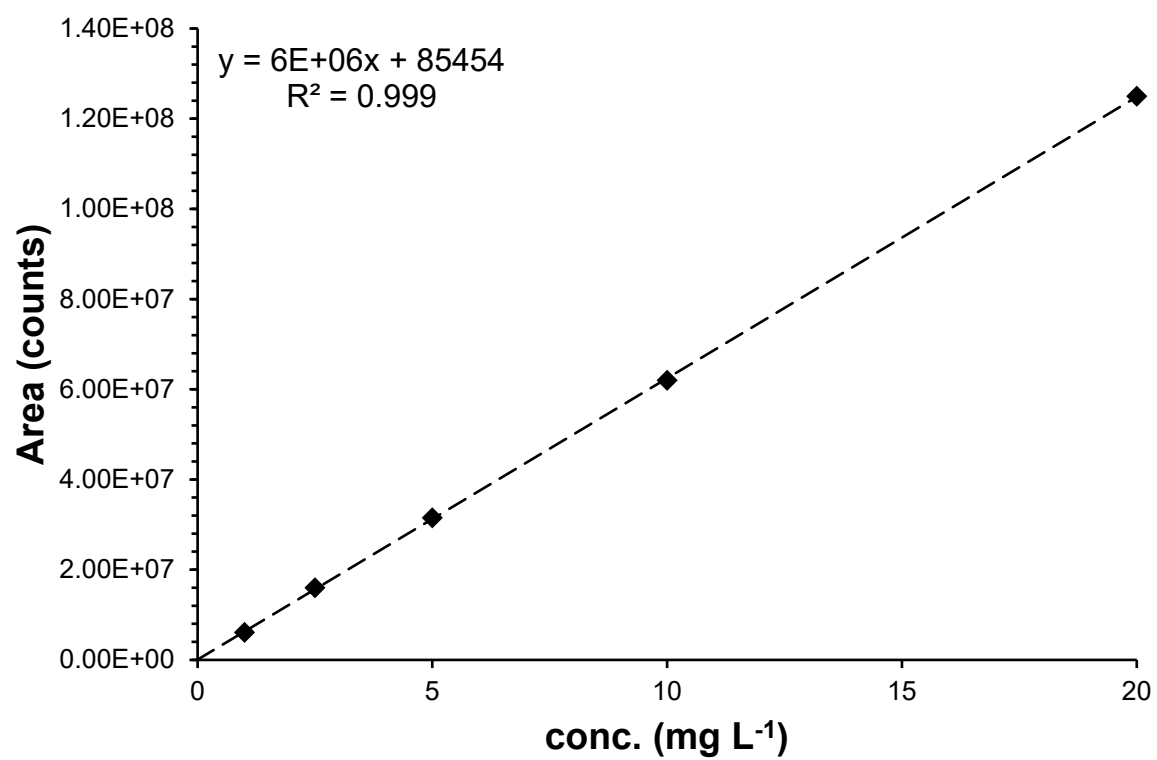

**Figure S19.** The calibration curve of 5-CQA.

## LEDA algorithm

**Equation S1.** LEDA<sub>CQA</sub> matrix for CQAs isomers speciation:

$$\begin{bmatrix} Area_{191}/Area_{Ri} = \left(\frac{Pi_{191}}{Ri}\right)_{isomer1} [\%]_{isomer1} + \left(\frac{Pi_{1191}}{Ri}\right)_{isomer2} [\%]_{isomer2} + \left(\frac{Pi_{191}}{Ri}\right)_{isomer3} [\%]_{isomer3} \\ Area_{179}/Area_{Ri} = \left(\frac{Pi_{179}}{Ri}\right)_{isomer1} [\%]_{isomer1} + \left(\frac{Pi_{179}}{Ri}\right)_{isomer2} [\%]_{isomer2} + \left(\frac{Pi_{179}}{Ri}\right)_{isomer3} [\%]_{isomer3} \\ Area_{173}/Area_{Ri} = \left(\frac{Pi_{173}}{Ri}\right)_{isomer1} [\%]_{isomer1} + \left(\frac{Pi_{173}}{Ri}\right)_{isomer2} [\%]_{isomer2} + \left(\frac{Pi_{173}}{Ri}\right)_{isomer3} [\%]_{isomer3} \\ Area_{135}/Area_{Ri} = \left(\frac{Pi_{135}}{Ri}\right)_{isomer1} [\%]_{isomer1} + \left(\frac{Pi_{135}}{Ri}\right)_{isomer2} [\%]_{isomer2} + \left(\frac{Pi_{135}}{Ri}\right)_{isomer3} [\%]_{isomer3} \end{bmatrix}$$

$$\begin{bmatrix} Area_{191}/Area_{Ri} \\ Area_{179}/Area_{Ri} \\ Area_{173}/Area_{Ri} \\ Area_{135}/Area_{Ri} \end{bmatrix} = A$$

$$\begin{bmatrix} \left(\frac{Pi_{191}}{Ri}\right)_{isomer1} & \left(\frac{Pi_{191}}{Ri}\right)_{isomer2} & \left(\frac{Pi_{191}}{Ri}\right)_{isomer3} \\ \left(\frac{Pi_{179}}{Ri}\right)_{isomer1} & \left(\frac{Pi_{179}}{Ri}\right)_{isomer2} & \left(\frac{Pi_{179}}{Ri}\right)_{isomer3} \\ \left(\frac{Pi_{173}}{Ri}\right)_{isomer1} & \left(\frac{Pi_{173}}{Ri}\right)_{isomer2} & \left(\frac{Pi_{173}}{Ri}\right)_{isomer3} \\ \left(\frac{Pi_{135}}{Ri}\right)_{isomer1} & \left(\frac{Pi_{135}}{Ri}\right)_{isomer2} & \left(\frac{Pi_{135}}{Ri}\right)_{isomer3} \end{bmatrix} = K$$

$$[[\%]_{isomer1} \quad [\%]_{isomer2} \quad [\%]_{isomer3}] = X$$

**Equation S2.** LEDA<sub>diCQA</sub> matrix for diCQAs isomers speciation:

$$\begin{bmatrix} Area_{353}/Area_{Ri} = \left(\frac{Pi_{353}}{Ri}\right)_{isomer1} [\%]_{isomer1} + \left(\frac{Pi_{2033}}{Ri}\right)_{isomer2} [\%]_{isomer2} + \left(\frac{Pi_{353}}{Ri}\right)_{isomer3} [\%]_{isomer3} \\ Area_{335}/Area_{Ri} = \left(\frac{Pi_{335}}{Ri}\right)_{isomer1} [\%]_{isomer1} + \left(\frac{Pi_{335}}{Ri}\right)_{isomer2} [\%]_{isomer2} + \left(\frac{Pi_{335}}{Ri}\right)_{isomer3} [\%]_{isomer3} \\ Area_{317}/Area_{Ri} = \left(\frac{Pi_{317}}{Ri}\right)_{isomer1} [\%]_{isomer1} + \left(\frac{Pi_{317}}{Ri}\right)_{isomer2} [\%]_{isomer2} + \left(\frac{Pi_{317}}{Ri}\right)_{isomer3} [\%]_{isomer3} \\ Area_{203}/Area_{Ri} = \left(\frac{Pi_{203}}{Ri}\right)_{isomer1} [\%]_{isomer1} + \left(\frac{Pi_{203}}{Ri}\right)_{isomer2} [\%]_{isomer2} + \left(\frac{Pi_{203}}{Ri}\right)_{isomer3} [\%]_{isomer3} \\ Area_{203}/Area_{Ri} = \left(\frac{Pi_{203}}{Ri}\right)_{isomer1} [\%]_{isomer1} + \left(\frac{Pi_{203}}{Ri}\right)_{isomer2} [\%]_{isomer2} + \left(\frac{Pi_{203}}{Ri}\right)_{isomer3} [\%]_{isomer3} \end{bmatrix}$$

$$\begin{bmatrix} Area_{353}/Area_{Ri} \\ Area_{335}/Area_{Ri} \\ Area_{317}/Area_{Ri} \\ Area_{299}/Area_{Ri} \\ Area_{203}/Area_{Ri} \end{bmatrix} = A$$

$$\begin{bmatrix} \left( \frac{Pi_{353}}{Ri} \right)_{isomer1} & \left( \frac{Pi_{353}}{Ri} \right)_{isomer2} & \left( \frac{Pi_{353}}{Ri} \right)_{isomer3} \\ \left( \frac{Pi_{335}}{Ri} \right)_{isomer1} & \left( \frac{Pi_{335}}{Ri} \right)_{isomer2} & \left( \frac{Pi_{335}}{Ri} \right)_{isomer3} \\ \left( \frac{Pi_{317}}{Ri} \right)_{isomer1} & \left( \frac{Pi_{317}}{Ri} \right)_{isomer2} & \left( \frac{Pi_{317}}{Ri} \right)_{isomer3} \\ \left( \frac{Pi_{299}}{Ri} \right)_{isomer1} & \left( \frac{Pi_{299}}{Ri} \right)_{isomer2} & \left( \frac{Pi_{299}}{Ri} \right)_{isomer3} \\ \left( \frac{Pi_{203}}{Ri} \right)_{isomer1} & \left( \frac{Pi_{203}}{Ri} \right)_{isomer2} & \left( \frac{Pi_{203}}{Ri} \right)_{isomer3} \end{bmatrix} = K$$

$$[[\%]_{isomer1} \quad [\%]_{isomer2} \quad [\%]_{isomer3}] = X$$

A general equation to solve each overdetermined LEDA matrix:

Traspose  $K$  matrix =  $K'$

Inverse  $(K \times K') = (K \times K')^{-1}$

$$X = (A \times K') \times (K \times K')^{-1} \quad \text{(Equation S3)}$$
